# Supplementary material for: Inflammation and Platelet Activation After COVID-19 Vaccines - Possible Mechanisms Behind Vaccine-Induced Immune Thrombocytopenia and Thrombosis
Source: PubMed Central journal article supplement (PMC8649717; doi:10.3389/fimmu.2021.779453), 2021-11-23
Supplement: DataSheet_1.pdf [file DataSheet_1.pdf]

# **Inflammation and platelet activation after COVID-19 vaccines - possible mechanisms behind Vaccine-induced Immune Thrombocytopenia and Thrombosis**

Sisse Rye Ostrowski<sup>1</sup>, Ole S. Søgaard<sup>2</sup>, Martin Tolstrup<sup>2</sup>, Nina B. Stærke<sup>2</sup>, Jens Lundgren<sup>3</sup>, Lars Østergaard<sup>2</sup>, Anne-Mette Hvas<sup>4</sup>

<sup>1</sup>Dept. of Clinical Immunology, Copenhagen Hospital Biobank Unit, Rigshospitalet, University of Copenhagen and Dept. of Clinical Medicine, Faculty of Health and Medical Sciences, University of Copenhagen;

<sup>2</sup>Dept. Infectious Disease, Aarhus University Hospital and Dept. of Clinical Medicine, Aarhus University;

<sup>3</sup>Dept. of Infectious Diseases, Rigshospitalet, University of Copenhagen and Dept. of Clinical Medicine, Faculty of Health and Medical Sciences, University of Copenhagen;

<sup>4</sup>Dept. Clinical Biochemistry, Aarhus University Hospital, Aarhus University and Dept. of Clinical Medicine, Aarhus University

## **Correspondence**

Anne-Mette Hvas, professor, chief physician, MD, PhD

Department of Clinical Biochemistry

Palle Juul-Jensens Boulevard 99

DK-8200 Denmark

[am.hvas@dadlnet.dk](mailto:am.hvas@dadlnet.dk)

## Supplementary

### **Table S1**

Intercorrelations between platelet activation markers pre-, post-vaccination and delta values in all (n=80), AZ (n=55) and mRNA (n=25) vaccinated individuals.

### **Figure S1**

Spearman correlations between post-vaccination platelet count and platelet activation markers (P-selectin, TGF- $\beta$  and CD40L) pre- and post-vaccination (and delta values) with AZ (n=55) or mRNA (n=25) vaccines.

**Table S1**

Intercorrelations between platelet activation markers pre-, post-vaccination and delta values in all (n=80), AZ (n=55) and mRNA (n=25) vaccinated individuals.

|                   |              | <b>TGF-β</b><br>Pre / Post /<br>Delta | <b>CD40L</b><br>Pre / Post /<br>Delta | <b>TGF-β</b><br>Pre / Post /<br>Delta | <b>CD40L</b><br>Pre / Post /<br>Delta | <b>TGF-β</b><br>Pre / Post /<br>Delta | <b>CD40L</b><br>Pre / Post /<br>Delta |
|-------------------|--------------|---------------------------------------|---------------------------------------|---------------------------------------|---------------------------------------|---------------------------------------|---------------------------------------|
|                   |              | <b>All n=80</b>                       |                                       | <b>AZ n=55</b>                        |                                       | <b>mRNA n=25</b>                      |                                       |
| <b>P-selectin</b> | <b>Pre</b>   | rho=0.738<br>p<0.0001                 | rho=0.698<br>p<0.0001                 | rho=0.665<br>p<0.0001                 | rho=0.627<br>p<0.0001                 | rho=0.819<br>p<0.0001                 | rho=0.758<br>p<0.0001                 |
|                   | <b>Post</b>  | rho=0.374<br>0.001                    | rho=0.490<br>p<0.0001                 | rho=0.415<br>0.002                    | rho=0.489<br>p<0.0001                 | rho=0.531<br>0.006                    | rho=0.482<br>0.015                    |
|                   | <b>Delta</b> | rho=0.402<br>p<0.0001                 | rho=0.487<br>p<0.0001                 | rho=0.445<br>0.001                    | rho=0.495<br>p<0.0001                 | rho=0.468<br>0.018                    | rho=0.495<br>0.012                    |
| <b>TGF-β</b>      | <b>Pre</b>   | N/A                                   | rho=0.944<br>p<0.0001                 | N/A                                   | rho=0.944<br>p<0.0001                 | N/A                                   | rho=0.926<br>p<0.0001                 |
|                   | <b>Post</b>  | N/A                                   | rho=0.688<br>p<0.0001                 | N/A                                   | rho=0.725<br>p<0.0001                 | N/A                                   | rho=0.897<br>p<0.0001                 |
|                   | <b>Delta</b> | N/A                                   | rho=0.792<br>p<0.0001                 | N/A                                   | rho=0.734<br>p<0.0001                 | N/A                                   | rho=0.899<br>p<0.0001                 |

Correlations between post-vaccination platelet count and pre-, post-vaccination and delta-value platelet activation marker levels were assessed by Spearman correlations displaying rho and p-values. Only the same time-points were compared i.e. pre- vs pre-vaccination, post- vs post-vaccination and delta vs delta values.

## Figure S1

Spearman correlations between post-vaccination platelet count and platelet activation markers (P-selectin, TGF- $\beta$  and CD40L) pre- and post-vaccination (and delta values) with AZ (n=55) or mRNA (n=25) vaccines. AZ=blue dots. mRNA=gray dots.

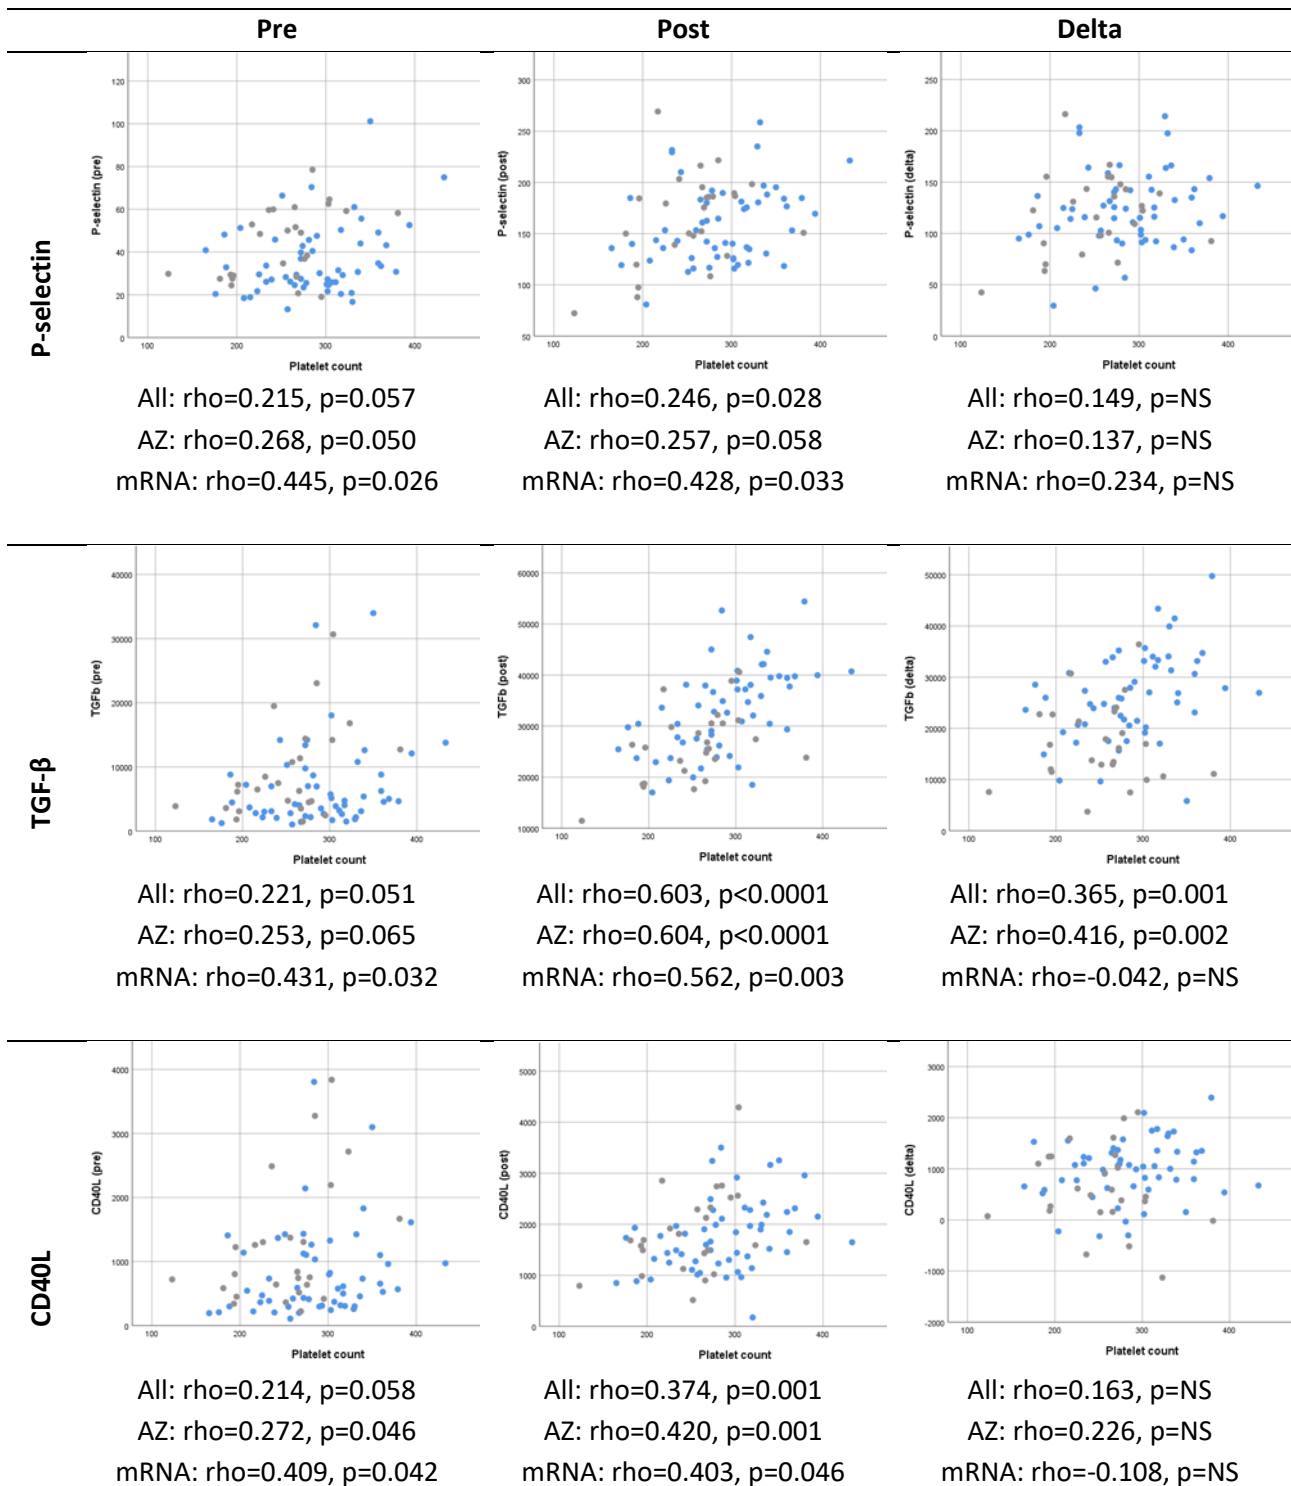

Inter correlations between platelet activations markers pre-, post-vaccination and delta-value levels were assessed by Spearman correlations displaying rho and p-values.
